# Supplementary material
Source: PubMed Central journal article supplement (PMC7486447)
Supplement: mmc1.pdf [file mmc1.pdf]

Consensus M GS WLLLSLVA-VTAAQSTTEE AKTFLKFN EAEDLSYQSSLASWNYNTITDENVQKMEAA AKWSAFYEEQS AKTY L'EIQMLT KRQL AQ
Zebraphis-ACE2
Zebraphis-ACE2-1
Zebraphis-ACE2-2
Chicken-ACE2
Guinea-pig-ACE2
Rabbit-ACE2
Hamster-ACE2
Mouse-ACE2
Rat-ACE2
Pangolin-ACE2
Ferret-ACE2
Otter-ACE2
Tiger-ACE2
Cat-ACE2
Cat-ACE2-1
Panda-ACE2
Dog-ACE2
Dog-ACE2-1
Dog-ACE2-2
Dog-ACE2-1
Bat-ACE2
Monkey-ACE2
Human-ACE2-3
Human-ACE2-1
Human-ACE2-2
Bufflo-ACE2
B.hybrid-ACE2
B.hybrid-ACE2-3
B.hybrid-ACE2-1
B.taurus-ACE2-1
B.taurus-ACE2-2
B.indicus-ACE2-1
B.indicus-ACE2-2
B.taurus-ACE2
B.hybrid-ACE2-2
Bison-ACE2
Sheep-ACE2
Goat-ACE2-1
Goat-ACE2-2
Horse-ACE2
Camel-ACE2
Alpaca-ACE2
Pig-ACE2-2
Pig-ACE2-1
Pig-ACE2-3

Consensus S GSS LSADKSKRLNTILN MSTIYSTGKVC PNNPQECV LEPGLDDIMENS DYN RLWAWEGWRAEVGKQLRPLYEEYVVLKNEAARA--NNYEDYGDYWRGDYEV
Zebraphis-ACE2
Zebraphis-ACE2-1
Zebraphis-ACE2-2
Frog-ACE2
Chicken-ACE2
Guinea-pig-ACE2
Rabbit-ACE2
Hamster-ACE2
Mouse-ACE2
Rat-ACE2
Pangolin-ACE2
Ferret-ACE2
Otter-ACE2
Tiger-ACE2
Cat-ACE2
Cat-ACE2-1
Panda-ACE2
Dog-ACE2
Dog-ACE2-1
Dog-ACE2-2
Bat-ACE2
Monkey-ACE2
Human-ACE2-3
Human-ACE2-1
Human-ACE2-2
Bufflo-ACE2
B.hybrid-ACE2
B.hybrid-ACE2-3
B.hybrid-ACE2-1
B.taurus-ACE2-1
B.taurus-ACE2-2
B.taurus-ACE2-1
B.indicus-ACE2-1
B.indicus-ACE2-2
B.taurus-ACE2
B.hybrid-ACE2-2
Bison-ACE2
Sheep-ACE2
Goat-ACE2-1
Goat-ACE2-2
Horse-ACE2
Camel-ACE2
Alpaca-ACE2
Pig-ACE2-2
Pig-ACE2-1
Pig-ACE2-3

Consensus

|                  |                                                                          |     |
|------------------|--------------------------------------------------------------------------|-----|
| Zebrafish-ACE2   | IDDPKYSYSDQVIEDARRIYKELPLYKELHAYVRAKLDQVYYP-HIGSDAALPAHLLGDMWGRFNTLNLVLP | 317 |
| Zebrafish-ACE2-1 | IDDPKYSYSDQVIEDARRIYKELPLYKELHAYVRAKLDQVYYP-HIGSDAALPAHLLGDMWGRFNTLNLVLP | 317 |
| Zebrafish-ACE2-2 | IDDPKYSYSDQVIEDARRIYKELPLYKELHAYVRAKLDQVYYP-HIGSDAALPAHLLGDMWGRFNTLNLVLP | 317 |
| Frog-ACE2        | LATDMVAYSRDLKIDVERTFQEIPLKYLHAFVRRNQVYVSRISDSGCLPAHLLGDMWGRFNTLNLVLP     | 320 |
| Chicken-ACE2     | DYPEYKYSRDLQVVDKVFTEIKPLYLHAYVRRKLVQYVSELINPTGCLPAHLLGDMWGRFNTLNLVLP     | 318 |
| Guinea-pig-ACE2  | EDMDGYNYSRNLIDVERTFAIKPLYLHAYVRRKLMETYPY-RISPTGCLPAHLLGDMWGRFNTLNLVLP    | 326 |
| Rabbit-ACE2      | EGADGYSYRDLIDVERTFSEIKPLYLHAFVRRKLMETYPY-RISPTGCLPAHLLGDMWGRFNTLNLVLP    | 318 |
| Hamster-ACE2     | EGADGYNYSRNLIDVERTFSEIKPLYLHAYVRRKLMETYPY-RISPTGCLPAHLLGDMWGRFNTLNLVLP   | 318 |
| Mouse-ACE2       | EGADGYNYSRNLIDVERTFAIKPLYLHAYVRRKLMETYPY-RISPTGCLPAHLLGDMWGRFNTLNLVLP    | 318 |
| Rat-ACE2         | EGVGEYYSRNLIDVERTFAIKPLYLHAYVRRKLMETYPY-RISPTGCLPAHLLGDMWGRFNTLNLVLP     | 318 |
| Pangolin-ACE2    | EGANGYYSRDLIDVERTFQIKPLYLHAYVRAKLMNTPY-RISPTGCLPAHLLGDMWGRFNTLNLVLP      | 318 |
| Ferret-ACE2      | EWADGYSYRNLIDVERTFQIKPLYLHAYVRAKLMNTPY-RISPTGCLPAHLLGDMWGRFNTLNLVLP      | 318 |
| Otter-ACE2       | EWADGYSYRNLIDVERTFQIKPLYLHAYVRAKLMNTPY-RISPTGCLPAHLLGDMWGRFNTLNLVLP      | 318 |
| Tiger-ACE2       | EMTDGYSYRDLIDVERTFQIKPLYLHAYVRAKLMNTPY-RISPTGCLPAHLLGDMWGRFNTLNLVLP      | 310 |
| Cat-ACE2         | EMTDGYSYRDLIDVERTFQIKPLYLHAYVRAKLMNTPY-RISPTGCLPAHLLGDMWGRFNTLNLVLP      | 318 |
| Cat-ACE2-1       | EMTDGYSYRDLIDVERTFQIKPLYLHAYVRAKLMNTPY-RISPTGCLPAHLLGDMWGRFNTLNLVLP      | 320 |
| Cat-ACE2-2       | EMTDGYSYRDLIDVERTFQIKPLYLHAYVRAKLMNTPY-RISPTGCLPAHLLGDMWGRFNTLNLVLP      | 318 |
| Dog-ACE2         | EWENGYSYRNLIDVERTFQIKPLYLHAYVRRKLMETYPY-RISPTGCLPAHLLGDMWGRFNTLNLVLP     | 317 |
| Dog-ACE2-2       | EWENGYSYRNLIDVERTFQIKPLYLHAYVRRKLMETYPY-RISPTGCLPAHLLGDMWGRFNTLNLVLP     | 317 |
| Dog-ACE2-1       | EWENGYSYRNLIDVERTFQIKPLYLHAYVRRKLMETYPY-RISPTGCLPAHLLGDMWGRFNTLNLVLP     | 317 |
| Bat-ACE2         | EGSPDLEYSRDLIDVERTFAIKPLYLHAYVRRKLMETYPY-RISPTGCLPAHLLGDMWGRFNTLNLVLP    | 317 |
| Monkey-ACE2      | NGVDGYSRDLIDVERTFAIKPLYLHAYVRAKLMNTPY-RISPTGCLPAHLLGDMWGRFNTLNLVLP       | 318 |
| Human-ACE2-3     | NGVDGYSRDLIDVERTFAIKPLYLHAYVRAKLMNTPY-RISPTGCLPAHLLGDMWGRFNTLNLVLP       | 318 |
| Human-ACE2       | NGVDGYSRDLIDVERTFAIKPLYLHAYVRAKLMNTPY-RISPTGCLPAHLLGDMWGRFNTLNLVLP       | 318 |
| Human-ACE2-1     | NGVDGYSRDLIDVERTFAIKPLYLHAYVRAKLMNTPY-RISPTGCLPAHLLGDMWGRFNTLNLVLP       | 318 |
| Human-ACE2-2     | NGVDGYSRDLIDVERTFAIKPLYLHAYVRAKLMNTPY-RISPTGCLPAHLLGDMWGRFNTLNLVLP       | 318 |
| Bufflo-ACE2      | TGAGDYSRDLIDVERTFAIKPLYLHAYVRAKLMNTPY-RISPTGCLPAHLLGDMWGRFNTLNLVLP       | 315 |
| B.hybrid-ACE2    | TGAGDYSRDLIDVERTFAIKPLYLHAYVRAKLMNTPY-RISPTGCLPAHLLGDMWGRFNTLNLVLP       | 317 |
| B.hybrid-ACE2-3  | TGAGDYSRDLIDVERTFAIKPLYLHAYVRAKLMNTPY-RISPTGCLPAHLLGDMWGRFNTLNLVLP       | 256 |
| B.hybrid-ACE2-1  | TGAGDYSRDLIDVERTFAIKPLYLHAYVRAKLMNTPY-RISPTGCLPAHLLGDMWGRFNTLNLVLP       | 317 |
| B.taurus-ACE2-1  | TGAGDYSRDLIDVERTFAIKPLYLHAYVRAKLMNTPY-RISPTGCLPAHLLGDMWGRFNTLNLVLP       | 317 |
| B.taurus-ACE2-2  | TGAGDYSRDLIDVERTFAIKPLYLHAYVRAKLMNTPY-RISPTGCLPAHLLGDMWGRFNTLNLVLP       | 256 |
| B.indicus-ACE2-1 | TGAGDYSRDLIDVERTFAIKPLYLHAYVRAKLMNTPY-RISPTGCLPAHLLGDMWGRFNTLNLVLP       | 317 |
| B.indicus-ACE2-2 | TGAGDYSRDLIDVERTFAIKPLYLHAYVRAKLMNTPY-RISPTGCLPAHLLGDMWGRFNTLNLVLP       | 317 |
| B.taurus-ACE2    | TGAGDYSRDLIDVERTFAIKPLYLHAYVRAKLMNTPY-RISPTGCLPAHLLGDMWGRFNTLNLVLP       | 317 |
| B.hybrid-ACE2-2  | TGAGDYSRDLIDVERTFAIKPLYLHAYVRAKLMNTPY-RISPTGCLPAHLLGDMWGRFNTLNLVLP       | 317 |
| Bison-ACE2       | TGAGDYSRDLIDVERTFAIKPLYLHAYVRAKLMNTPY-RISPTGCLPAHLLGDMWGRFNTLNLVLP       | 317 |
| Sheep-ACE2       | TGAGDYSRDLIDVERTFAIKPLYLHAYVRAKLMNTPY-RISPTGCLPAHLLGDMWGRFNTLNLVLP       | 317 |
| Goat-ACE2-1      | TGAGDYSRDLIDVERTFAIKPLYLHAYVRAKLMNTPY-RISPTGCLPAHLLGDMWGRFNTLNLVLP       | 317 |
| Goat-ACE2-2      | TGAGDYSRDLIDVERTFAIKPLYLHAYVRAKLMNTPY-RISPTGCLPAHLLGDMWGRFNTLNLVLP       | 256 |
| Horse-ACE2       | EGSPDLEYSRDLIDVERTFAIKPLYLHAYVRAKLMNTPY-RISPTGCLPAHLLGDMWGRFNTLNLVLP     | 318 |
| Camel-ACE2       | MWAGDYSRDLIDVERTFAIKPLYLHAYVRAKLMNTPY-RISPTGCLPAHLLGDMWGRFNTLNLVLP       | 318 |
| Alpaca-ACE2      | MWAGDYSRDLIDVERTFAIKPLYLHAYVRAKLMNTPY-RISPTGCLPAHLLGDMWGRFNTLNLVLP       | 318 |
| Pig-ACE2-2       | TGTGDYSRNLQMEDVERTFAIKPLYLHAYVRAKLMNTPY-RISPTGCLPAHLLGDMWGRFNTLNLVLP     | 318 |
| Pig-ACE2-1       | TGTGDYSRNLQMEDVERTFAIKPLYLHAYVRAKLMNTPY-RISPTGCLPAHLLGDMWGRFNTLNLVLP     | 318 |
| Pig-ACE2-3       | TGTGDYSRNLQMEDVERTFAIKPLYLHAYVRAKLMNTPY-RISPTGCLPAHLLGDMWGRFNTLNLVLP     | 196 |

Consensus

|                  |                                                                        |     |
|------------------|------------------------------------------------------------------------|-----|
| Zebrafish-ACE2   | GLP MTQGFVNSMLTEPGDGRKVVCHPTAWDLGK-GDFRIKMTKVTMDDFLTAHHEMGIQYDMAYAQP   | 426 |
| Zebrafish-ACE2-1 | NMPAFDNNFNNNSMFIKPE-ERDVVCHPTAWDMGNRRKDFRIKMTKVTMDDFLTAHHEMGIQYDMAYAQP | 426 |
| Zebrafish-ACE2-2 | NMPAFDNNFNNNSMFIKPE-ERDVVCHPTAWDMGNRRKDFRIKMTKVTMDDFLTAHHEMGIQYDMAYAQP | 426 |
| Frog-ACE2        | DLFALNENFNNNSMFIKPE-ERDVVCHPTAWDMGNRRKDFRIKMTKVTMDDFLTAHHEMGIQYDMAYAQP | 429 |
| Chicken-ACE2     | GLPMTQGFWNSMLTEPGDGRKVVCHPTAWDLGK-NDFRIKMTKVTMDDFLTAHHEMGIQYDMAYAQP    | 427 |
| Guinea-pig-ACE2  | GLPMTQGFWNSMLTEPGDGRKVVCHPTAWDLGK-NDFRIKMTKVTMDDFLTAHHEMGIQYDMAYAQP    | 427 |
| Rabbit-ACE2      | GLPMTQGFWNSMLTEPGDGRKVVCHPTAWDLGK-NDFRIKMTKVTMDDFLTAHHEMGIQYDMAYAQP    | 427 |
| Hamster-ACE2     | GLPMTQGFWNSMLTEPGDGRKVVCHPTAWDLGK-NDFRIKMTKVTMDDFLTAHHEMGIQYDMAYAQP    | 427 |
| Mouse-ACE2       | GLPMTQGFWNSMLTEPGDGRKVVCHPTAWDLGK-NDFRIKMTKVTMDDFLTAHHEMGIQYDMAYAQP    | 427 |
| Rat-ACE2         | GLPMTQGFWNSMLTEPGDGRKVVCHPTAWDLGK-NDFRIKMTKVTMDDFLTAHHEMGIQYDMAYAQP    | 427 |
| Pangolin-ACE2    | GLPMTQGFWNSMLTEPGDGRKVVCHPTAWDLGK-NDFRIKMTKVTMDDFLTAHHEMGIQYDMAYAQP    | 427 |
| Ferret-ACE2      | GLPMTQGFWNSMLTEPGDGRKVVCHPTAWDLGK-NDFRIKMTKVTMDDFLTAHHEMGIQYDMAYAQP    | 427 |
| Otter-ACE2       | GLPMTQGFWNSMLTEPGDGRKVVCHPTAWDLGK-NDFRIKMTKVTMDDFLTAHHEMGIQYDMAYAQP    | 427 |
| Tiger-ACE2       | GLPMTQGFWNSMLTEPGDGRKVVCHPTAWDLGK-NDFRIKMTKVTMDDFLTAHHEMGIQYDMAYAQP    | 427 |
| Cat-ACE2         | GLPMTQGFWNSMLTEPGDGRKVVCHPTAWDLGK-NDFRIKMTKVTMDDFLTAHHEMGIQYDMAYAQP    | 427 |
| Cat-ACE2-1       | GLPMTQGFWNSMLTEPGDGRKVVCHPTAWDLGK-NDFRIKMTKVTMDDFLTAHHEMGIQYDMAYAQP    | 429 |
| Panda-ACE2       | GLPMTQGFWNSMLTEPGDGRKVVCHPTAWDLGK-NDFRIKMTKVTMDDFLTAHHEMGIQYDMAYAQP    | 426 |
| Dog-ACE2         | GLPMTQGFWNSMLTEPGDGRKVVCHPTAWDLGK-NDFRIKMTKVTMDDFLTAHHEMGIQYDMAYAQP    | 426 |
| Dog-ACE2-2       | GLPMTQGFWNSMLTEPGDGRKVVCHPTAWDLGK-NDFRIKMTKVTMDDFLTAHHEMGIQYDMAYAQP    | 305 |
| Dog-ACE2-1       | GLPMTQGFWNSMLTEPGDGRKVVCHPTAWDLGK-NDFRIKMTKVTMDDFLTAHHEMGIQYDMAYAQP    | 426 |
| Bat-ACE2         | GLPMTQGFWNSMLTEPGDGRKVVCHPTAWDLGK-NDFRIKMTKVTMDDFLTAHHEMGIQYDMAYAQP    | 427 |
| Monkey-ACE2      | GLPMTQGFWNSMLTEPGDGRKVVCHPTAWDLGK-NDFRIKMTKVTMDDFLTAHHEMGIQYDMAYAQP    | 427 |
| Human-ACE2-3     | GLPMTQGFWNSMLTEPGDGRKVVCHPTAWDLGK-NDFRIKMTKVTMDDFLTAHHEMGIQYDMAYAQP    | 427 |
| Human-ACE2       | GLPMTQGFWNSMLTEPGDGRKVVCHPTAWDLGK-NDFRIKMTKVTMDDFLTAHHEMGIQYDMAYAQP    | 427 |
| Human-ACE2-1     | GLPMTQGFWNSMLTEPGDGRKVVCHPTAWDLGK-NDFRIKMTKVTMDDFLTAHHEMGIQYDMAYAQP    | 427 |
| Human-ACE2-2     | GLPMTQGFWNSMLTEPGDGRKVVCHPTAWDLGK-NDFRIKMTKVTMDDFLTAHHEMGIQYDMAYAQP    | 427 |
| Bufflo-ACE2      | GLPMTQGFWNSMLTEPGDGRKVVCHPTAWDLGK-NDFRIKMTKVTMDDFLTAHHEMGIQYDMAYAQP    | 425 |
| B.hybrid-ACE2    | GLPMTQGFWNSMLTEPGDGRKVVCHPTAWDLGK-NDFRIKMTKVTMDDFLTAHHEMGIQYDMAYAQP    | 426 |
| B.hybrid-ACE2-3  | GLPMTQGFWNSMLTEPGDGRKVVCHPTAWDLGK-NDFRIKMTKVTMDDFLTAHHEMGIQYDMAYAQP    | 365 |
| B.hybrid-ACE2-1  | GLPMTQGFWNSMLTEPGDGRKVVCHPTAWDLGK-NDFRIKMTKVTMDDFLTAHHEMGIQYDMAYAQP    | 426 |
| B.taurus-ACE2-1  | GLPMTQGFWNSMLTEPGDGRKVVCHPTAWDLGK-NDFRIKMTKVTMDDFLTAHHEMGIQYDMAYAQP    | 426 |
| B.taurus-ACE2-2  | GLPMTQGFWNSMLTEPGDGRKVVCHPTAWDLGK-NDFRIKMTKVTMDDFLTAHHEMGIQYDMAYAQP    | 365 |
| B.indicus-ACE2-1 | GLPMTQGFWNSMLTEPGDGRKVVCHPTAWDLGK-NDFRIKMTKVTMDDFLTAHHEMGIQYDMAYAQP    | 426 |
| B.indicus-ACE2-2 | GLPMTQGFWNSMLTEPGDGRKVVCHPTAWDLGK-NDFRIKMTKVTMDDFLTAHHEMGIQYDMAYAQP    | 426 |
| B.taurus-ACE2    | GLPMTQGFWNSMLTEPGDGRKVVCHPTAWDLGK-NDFRIKMTKVTMDDFLTAHHEMGIQYDMAYAQP    | 426 |
| B.hybrid-ACE2-2  | GLPMTQGFWNSMLTEPGDGRKVVCHPTAWDLGK-NDFRIKMTKVTMDDFLTAHHEMGIQYDMAYAQP    | 426 |
| Bison-ACE2       | GLPMTQGFWNSMLTEPGDGRKVVCHPTAWDLGK-NDFRIKMTKVTMDDFLTAHHEMGIQYDMAYAQP    | 426 |
| Sheep-ACE2       | GLPMTQGFWNSMLTEPGDGRKVVCHPTAWDLGK-NDFRIKMTKVTMDDFLTAHHEMGIQYDMAYAQP    | 426 |
| Goat-ACE2-1      | GLPMTQGFWNSMLTEPGDGRKVVCHPTAWDLGK-NDFRIKMTKVTMDDFLTAHHEMGIQYDMAYAQP    | 426 |
| Goat-ACE2-2      | GLPMTQGFWNSMLTEPGDGRKVVCHPTAWDLGK-NDFRIKMTKVTMDDFLTAHHEMGIQYDMAYAQP    | 365 |
| Horse-ACE2       | GLPMTQGFWNSMLTEPGDGRKVVCHPTAWDLGK-NDFRIKMTKVTMDDFLTAHHEMGIQYDMAYAQP    | 427 |
| Camel-ACE2       | GLPMTQGFWNSMLTEPGDGRKVVCHPTAWDLGK-NDFRIKMTKVTMDDFLTAHHEMGIQYDMAYAQP    | 427 |
| Alpaca-ACE2      | GLPMTQGFWNSMLTEPGDGRKVVCHPTAWDLGK-NDFRIKMTKVTMDDFLTAHHEMGIQYDMAYAQP    | 427 |
| Pig-ACE2-2       | GLPMTQGFWNSMLTEPGDGRKVVCHPTAWDLGK-NDFRIKMTKVTMDDFLTAHHEMGIQYDMAYAQP    | 427 |
| Pig-ACE2-1       | GLPMTQGFWNSMLTEPGDGRKVVCHPTAWDLGK-NDFRIKMTKVTMDDFLTAHHEMGIQYDMAYAQP    | 427 |
| Pig-ACE2-3       | GLPMTQGFWNSMLTEPGDGRKVVCHPTAWDLGK-NDFRIKMTKVTMDDFLTAHHEMGIQYDMAYAQP    | 405 |





Consensus

EWNNDNYLFRSSVAYAMR YFS KNQTI FGEENVVSDLKPRISF FVFTSP NVSDIIPRTEVE AIR SR RINDAFRLDDNSLEFLGIQPTLGGPPPEPVTIWL

Table with 2 columns: Species (e.g., Zebrafish-ACE2, Human-ACE2-1) and Sequence (aligned amino acid sequences). Includes a color-coded bar above the sequences.

Consensus

I FGVVGMVVVGVVLLVIFLTIPTGIR RRRK QA EEN PY SVDL KGENN GFQN DD QT SF

Table with 2 columns: Species (e.g., Zebrafish-ACE2, Human-ACE2-1) and Sequence (aligned amino acid sequences). Includes a color-coded bar above the sequences.

| Consensus        |             |
|------------------|-------------|
| Zebrafish-ACE2   | ----- 785   |
| Zebrafish-ACE2-1 | ----- 807   |
| Zebrafish-ACE2-2 | ----- 818   |
| Frog-ACE2        | TMNNTTF 862 |
| Chicken-ACE2     | ----- 808   |
| Guinea-pig-ACE2  | ----- 813   |
| Rabbit-ACE2      | ----- 805   |
| Hamster-ACE2     | ----- 805   |
| Mouse-ACE2       | ----- 805   |
| Rat-ACE2         | ----- 805   |
| Pangolin-ACE2    | ----- 805   |
| Ferret-ACE2      | ----- 805   |
| Otter-ACE2       | ----- 805   |
| Tiger-ACE2       | ----- 797   |
| Cat-ACE2         | ----- 805   |
| Cat-ACE2-1       | ----- 807   |
| Panda-ACE2       | ----- 805   |
| Dog-ACE2         | ----- 804   |
| Dog-ACE2-2       | ----- 683   |
| Dog-ACE2-1       | ----- 804   |
| Bat-ACE2         | ----- 805   |
| Monkey-ACE2      | ----- 805   |
| Human-ACE2-3     | ----- 694   |
| Human-ACE2       | ----- 805   |
| Human-ACE2-1     | ----- 786   |
| Human-ACE2-2     | ----- 772   |
| Bufflo-ACE2      | ----- 803   |
| B.hybrid-ACE2    | ----- 811   |
| B.hybrid-ACE2-3  | ----- 750   |
| B.hybrid-ACE2-1  | ----- 811   |
| B.taurus-ACE2-1  | ----- 811   |
| B.taurus-ACE2-2  | ----- 750   |
| B.indicus-ACE2-1 | ----- 811   |
| B.indicus-ACE2-2 | ----- 804   |
| B.taurus-ACE2    | ----- 804   |
| B.hybrid-ACE2-2  | ----- 804   |
| Bison-ACE2       | ----- 431   |
| Sheep-ACE2       | ----- 804   |
| Goat-ACE2-1      | ----- 804   |
| Goat-ACE2-2      | ----- 743   |
| Horse-ACE2       | ----- 805   |
| Camel-ACE2       | ----- 805   |
| Alpaca-ACE2      | ----- 805   |
| Pig-ACE2-2       | ----- 792   |
| Pig-ACE2-1       | ----- 805   |
| Pig-ACE2-3       | ----- 683   |

Supplemental Fig. S1: Multiple sequence alignment of vertebrate ACE2 orthologs/paralogs. Sequence of ACE2 protein precursors were extracted from NCBI Gene and relevant databases (<https://www.ncbi.nlm.nih.gov/gene>). The protein sequences were aligned using the multiple sequence alignment tools of ClustalW or Muscle through an EMBL-EBI port (<https://www.ebi.ac.uk/>) under the default parameters.
